# Supplementary material
Source: PubMed Central journal article supplement (PMC6765461)
Supplement: NIHMS1017442-supplement-Supp_TableS1.pdf [file NIHMS1017442-supplement-Supp_TableS1.pdf]

**Supplemental Table 1. T-test (mean) and Wilcoxon Rank-Sum tests (distribution) comparisons of characteristics and outcomes by hours in latent phase duration at mean, median, 80th, 90th, 95<sup>th</sup> percentiles among low-risk women in spontaneous labor**

| <i>Nulliparous women, overall n=665</i>                                                                  |                |                       |                   |                |                 |              |                |                |               |                |                                       |                                                 |                                |                                       |                                                 |
|----------------------------------------------------------------------------------------------------------|----------------|-----------------------|-------------------|----------------|-----------------|--------------|----------------|----------------|---------------|----------------|---------------------------------------|-------------------------------------------------|--------------------------------|---------------------------------------|-------------------------------------------------|
| Each cell shows hours of latent labor (sample size continuing labor at and beyond point of distribution) |                |                       |                   |                |                 |              |                |                |               |                |                                       |                                                 |                                |                                       |                                                 |
| Point of distribution                                                                                    | Overall sample | Not married/partnered | Married/partnered | <i>P</i> value | No hypertension | Hypertension | <i>P</i> value | No diabetes    | Diabetes      | <i>P</i> value | Birthweight small for gestational age | <i>P</i> value (compared to at gestational age) | Birthweight at gestational age | Birthweight large for gestational age | <i>P</i> value (compared to at gestational age) |
| <b>Mean</b>                                                                                              | 11.77<br>(220) | 11.71<br>(213)        | 15.36<br>(5)      | .230           | 11.71<br>(215)  | 14.20<br>(6) | .394           | 11.75<br>(201) | 12.01<br>(19) | .877           | 13.97<br>(13)                         | .437                                            | 11.36<br>(157)                 | 10.50<br>(25)                         | .406                                            |
| <b>Median</b>                                                                                            | 9<br>(305)     | 9<br>(292)            | 10.6<br>(7)       | .302           | 9<br>(298)      | 9<br>(7)     | .721           | 9<br>(280)     | 11.25<br>(21) | .339           | 11<br>(14)                            | .437                                            | 8.50<br>(216)                  | 8.50<br>(33)                          | .958                                            |
| <b>80<sup>th</sup> percentile</b>                                                                        | 17<br>(124)    | 17<br>(118)           | 22.09<br>(3)      |                | 17<br>(120)     | 22.65<br>(3) |                | 17<br>(113)    | 19.66<br>(9)  |                | 21.01<br>(6)                          |                                                 | 16.24<br>(86)                  | 14.40<br>(13)                         |                                                 |
| <b>90<sup>th</sup> percentile</b>                                                                        | 24<br>(62)     | 24<br>(60)            | 27.30<br>(2)      |                | 24<br>(59)      | 27.50<br>(2) |                | 24<br>(59)     | 22<br>(8)     |                | 22.20<br>(3)                          |                                                 | 22.90<br>(43)                  | 19.78<br>(7)                          |                                                 |
| <b>95<sup>th</sup> percentile</b>                                                                        | 30<br>(31)     | 30<br>(30)            | 38.17<br>(1)      |                | 30<br>(30)      | 37.29<br>(1) |                | 30.33<br>(28)  | 25.34<br>(3)  |                | 28.10<br>(2)                          |                                                 | 29.70<br>(22)                  | 25.21<br>(4)                          |                                                 |

**Nulliparous women, overall n=665**

**Each cell shows hours of latent labor (sample size continuing labor at and beyond point of distribution)**

| Point of distribution             | Overall sample | Maternal age <35 | Maternal age 35+ | <i>P</i> value | Overweight BMI | <i>P</i> value (compared to Normal/underweight BMI) | Normal/underweight BMI | Obese BMI     | <i>P</i> value (compared to Normal/underweight BMI) | Lowest 10% height | <i>P</i> value (compared to middle 10-80%) | Middle 10-80% height | Highest 10% height | <i>P</i> value (compared to middle 10-80%) | CDC weight gain recommended | CDC weight gain over | <i>P</i> value |
|-----------------------------------|----------------|------------------|------------------|----------------|----------------|-----------------------------------------------------|------------------------|---------------|-----------------------------------------------------|-------------------|--------------------------------------------|----------------------|--------------------|--------------------------------------------|-----------------------------|----------------------|----------------|
| <b>Mean</b>                       | 11.77<br>(220) | 11.93<br>(179)   | 11.78<br>(38)    | .885           | 12.89<br>(46)  | .174                                                | 11.33<br>(159)         | 12.68<br>(21) | .372                                                | 12.88<br>(15)     | .555                                       | 11.82<br>(163)       | 11.63<br>(22)      | .590                                       | 11.76<br>(212)              | 12.02<br>(6)         | .923           |
| <b>Median</b>                     | 9<br>(305)     | 9.37<br>(225)    | 9.250<br>(63)    | .353           | 10.5<br>(57)   | .132                                                | 8.50<br>(214)          | 10.38<br>(28) | .168                                                | 10<br>(21)        | .890                                       | 9.17<br>(218)        | 9.50<br>(31)       | .831                                       | 9<br>(291)                  | 10.5<br>(9)          | .533           |
| <b>80<sup>th</sup> percentile</b> | 17<br>(124)    | 17.77<br>(90)    | 16.50<br>(26)    |                | 17.80<br>(23)  |                                                     | 17<br>(85)             | 17.87<br>(12) |                                                     | 21.58<br>(9)      |                                            | 17<br>(89)           | 16<br>(12)         |                                            | 17.15<br>(114)              | 13.96<br>(4)         |                |
| <b>90<sup>th</sup> percentile</b> | 24<br>(62)     | 24.00<br>(48)    | 24.00<br>(14)    |                | 24.41<br>(12)  |                                                     | 23.25<br>(42)          | 25.80<br>(6)  |                                                     | 25.28<br>(5)      |                                            | 24<br>(45)           | 22.5<br>(6)        |                                            | 24<br>(60)                  | 19.90<br>(2)         |                |
| <b>95<sup>th</sup> percentile</b> | 30<br>(31)     | 30.00<br>(24)    | 29.75<br>(7)     |                | 32.2<br>(6)    |                                                     | 29.05<br>(21)          | 34.66<br>(3)  |                                                     | 30<br>(3)         |                                            | 30.2<br>(22)         | 26.4<br>(3)        |                                            | 30<br>(30)                  | 29.20<br>(1)         |                |

**Nulliparous women, overall n=665**

**Each cell shows hours of latent labor (sample size continuing labor at and beyond point of distribution)**

| Point of distribution             | Overall sample | No GBS         | GBS           | <i>P</i> value | No PROM        | PROM         | <i>P</i> value | Early term delivery | <i>P</i> value (compared to term delivery) | Term delivery  | Late term delivery | <i>P</i> value (compared to term delivery) | OA presentation | OP/OT presentation | <i>P</i> value | No chorionionitis | Chorionionitis | <i>P</i> value |
|-----------------------------------|----------------|----------------|---------------|----------------|----------------|--------------|----------------|---------------------|--------------------------------------------|----------------|--------------------|--------------------------------------------|-----------------|--------------------|----------------|-------------------|----------------|----------------|
| <b>Mean</b>                       | 11.77<br>(220) | 11.74<br>(167) | 11.79<br>(53) | .964           | 11.71<br>(213) | 13.63<br>(8) | .484           | 11.57<br>(27)       | .925                                       | 11.45<br>(139) | 12.68<br>(51)      | .255                                       | 11.59<br>(195)  | 16.21<br>(15)      | .010           | 11.69<br>(207)    | 13.22<br>(11)  | .440           |
| <b>Median</b>                     | 9<br>(305)     | 9<br>(232)     | 9.50<br>(68)  | .579           | 9<br>(295)     | 13.33<br>(8) | .220           | 9.48<br>(39)        | .874                                       | 8.5<br>(189)   | 10<br>(75)         | .284                                       | 9<br>(265)      | 11.75<br>(20)      | .023           | 9<br>(289)        | 9.50<br>(16)   | .250           |
| <b>80<sup>th</sup> percentile</b> | 17<br>(124)    | 17<br>(92)     | 17.78<br>(27) |                | 17<br>(120)    | 17<br>(4)    |                | 16.86<br>(16)       |                                            | 17<br>(76)     | 17.83<br>(29)      |                                            | 17<br>(106)     | 22.40<br>(8)       |                | 17<br>(117)       | 24<br>(7)      |                |
| <b>90<sup>th</sup> percentile</b> | 24<br>(62)     | 24<br>(48)     | 22.57<br>(14) |                | 24<br>(60)     | 21.50<br>(2) |                | 24<br>(9)           |                                            | 22.28<br>(38)  | 26<br>(15)         |                                            | 24<br>(53)      | 30.23<br>(4)       |                | 23.27<br>(56)     | 27<br>(4)      |                |
| <b>95<sup>th</sup> percentile</b> | 30<br>(31)     | 30.18<br>(23)  | 27.68<br>(7)  |                | 30<br>(30)     | 28.75<br>(1) |                | 28.08<br>(4)        |                                            | 29<br>(20)     | 32.27<br>(8)       |                                            | 29.1<br>(26)    | 53.11<br>(2)       |                | 30<br>(29)        | 31.70<br>(2)   |                |

**Multiparous women (n=616)**

**Each cell shows hours of latent labor (sample size continuing labor at and beyond point of distribution)**

| Point of distribution             | Overall sample | Not married/partnered | Married/partnered | <i>P</i> value | No hypertension | Hypertension | <i>P</i> value | No diabetes    | Diabetes     | <i>P</i> value | Birthweight small for gestational age | <i>P</i> value (compared to at gestational age) | Birthweight at gestational age | Birthweight large for gestational age | <i>P</i> value (compared to at gestational age) |
|-----------------------------------|----------------|-----------------------|-------------------|----------------|-----------------|--------------|----------------|----------------|--------------|----------------|---------------------------------------|-------------------------------------------------|--------------------------------|---------------------------------------|-------------------------------------------------|
| <b>Mean</b>                       | 9.28<br>(211)  | 14.19<br>(8)          | 9.16<br>(205)     | .057           | 9.30<br>(205)   | 8.41<br>(6)  | .718           | 9.43<br>(201)  | 6.91<br>(13) | .139           | 11.09 (7)                             | .236                                            | 9.15<br>(161)                  | 10.09<br>(16)                         | .305                                            |
| <b>Median</b>                     | 6.83<br>(287)  | 15.41<br>(7)          | 6.50<br>(290)     | .022           | 6.83<br>(279)   | 6.63<br>(8)  | .744           | 7<br>(273)     | 5.18<br>(18) | .163           | 5.50<br>(13)                          | .890                                            | 6.92<br>(217)                  | 6.42<br>(28)                          | .764                                            |
| <b>80<sup>th</sup> percentile</b> | 13.50<br>(116) | 18.89<br>(3)          | 13<br>(120)       |                | 13.50<br>(113)  | 13.15<br>(4) |                | 13.50<br>(112) | 11.52<br>(7) |                | 14.10<br>(5)                          |                                                 | 13.50<br>(90)                  | 12.57<br>(11)                         |                                                 |
| <b>90<sup>th</sup> percentile</b> | 19<br>(59)     | 23.56<br>(2)          | 18.80<br>(56)     |                | 19.15<br>(56)   | 15.32<br>(2) |                | 19.41<br>(54)  | 14.90<br>(4) |                | 14.55<br>(3)                          |                                                 | 19.26<br>(44)                  | 19.60<br>(6)                          |                                                 |
| <b>95<sup>th</sup> percentile</b> | 24.50<br>(29)  | 29.79<br>(1)          | 24.17<br>(28)     |                | 24.50<br>(29)   | 17.63<br>(1) |                | 24.51<br>(27)  | 19.53<br>(2) |                | 47.81<br>(2)                          |                                                 | 24.50<br>(23)                  | 23<br>(3)                             |                                                 |

**Multiparous women (n=616)**

**Each cell shows hours of latent labor (sample size continuing labor at and beyond point of distribution)**

| Point of distribution             | Overall sample | Maternal age <35 years | Maternal age 35+ years | <i>P</i> value | Overweight BMI | <i>P</i> value (compared to Normal/underweight BMI) | Normal/underweight BMI | Obese BMI     | <i>P</i> value (compared to Normal/underweight BMI) | Lowest 10% height | <i>P</i> value (compared to middle 10-80%) | Middle 10-80% height | Highest 10% height | <i>P</i> value (compared to middle 10-80%) | CDC weight gain recommended | CDC weight gain over | <i>P</i> value |
|-----------------------------------|----------------|------------------------|------------------------|----------------|----------------|-----------------------------------------------------|------------------------|---------------|-----------------------------------------------------|-------------------|--------------------------------------------|----------------------|--------------------|--------------------------------------------|-----------------------------|----------------------|----------------|
| <b>Mean</b>                       | 9.28<br>(211)  | 8.85<br>(156)          | 10.23<br>(58)          | .136           | 9.19<br>(40)   | .990                                                | 9.2<br>(142)           | 9.95<br>(27)  | .585                                                | 9.20<br>(15)      | 0.860                                      | 9.48<br>(149)        | 8.53<br>(29)       | .698                                       | 9.34<br>(202)               | 6.63 (6)             | .261           |
| <b>Median</b>                     | 6.83<br>(287)  | 6.75<br>(205)          | 6.75<br>(78)           | .638           | 7.42<br>(61)   | .977                                                | 6.33<br>(195)          | 8.50<br>(30)  | .059                                                | 7.67<br>(23)      | .566                                       | 7<br>(203)           | 6 (38)             | .769                                       | 7<br>(276)                  | 5.50<br>(9)          | .313           |
| <b>80<sup>th</sup> percentile</b> | 13.50<br>(116) | 13.00<br>(85)          | 14.50<br>(32)          |                | 13.12<br>(25)  |                                                     | 13<br>(81)             | 16.03<br>(12) |                                                     | 14.01<br>(9)      |                                            | 14<br>(82)           | 12<br>(17)         |                                            | 13.50<br>(112)              | 12.62<br>(4)         |                |
| <b>90<sup>th</sup> percentile</b> | 19<br>(59)     | 17.00<br>(44)          | 20.63<br>(16)          |                | 19.33<br>(13)  |                                                     | 18.52<br>(39)          | 19.60<br>(6)  |                                                     | 20.50<br>(6)      |                                            | 19.46<br>(41)        | 16.95<br>(8)       |                                            | 19.37<br>(56)               | 14.40<br>(2)         |                |
| <b>95<sup>th</sup> percentile</b> | 24.50<br>(29)  | 23.65<br>(21)          | 25.62<br>(8)           |                | 24.88<br>(7)   |                                                     | 24.36<br>(20)          | 23.21<br>(3)  |                                                     | 22.99<br>(3)      |                                            | 24.44<br>(21)        | 23.45<br>(4)       |                                            | 24.5<br>(29)                | 15.21<br>(1)         |                |

**Multiparous women (n=616)**

**Each cell shows hours of latent labor (sample size continuing labor at and beyond point of distribution)**

| Point of distribution             | Overall sample | No GBS        | GBS           | P value | No PROM        | PROM         | P value | Early term delivery | P value (compared to term delivery) | Term delivery | Late term delivery | P value (compared to term delivery) | OA presentation | OP/OT presentation | P value | No chorioamnionitis | Chorioamnionitis | P value |
|-----------------------------------|----------------|---------------|---------------|---------|----------------|--------------|---------|---------------------|-------------------------------------|---------------|--------------------|-------------------------------------|-----------------|--------------------|---------|---------------------|------------------|---------|
| <b>Mean</b>                       | 9.28<br>(211)  | 9.47<br>(157) | 8.73<br>(54)  | .439    | 9.22<br>(203)  | 11.16<br>(6) | .422    | 9.59<br>(31)        | .345                                | 8.59<br>(135) | 10.97<br>(45)      | .012                                | 9.29<br>(196)   | 8.48<br>(7)        | .673    | 9.05<br>(205)       | 18.33<br>(5)     | <.001   |
| <b>Median</b>                     | 6.83<br>(287)  | 6.75<br>(217) | 7.33<br>(69)  | .999    | 6.58<br>(278)  | 8<br>(9)     | .199    | 7<br>(47)           | .934                                | 6.50<br>(177) | 7.50<br>(66)       | .125                                | 7<br>(265)      | 5.75<br>(14)       | .585    | 6.50<br>(290)       | 15.90<br>(7)     | .001    |
| <b>80<sup>th</sup> percentile</b> | 13.50<br>(116) | 13.50<br>(89) | 12.81<br>(28) |         | 13.50<br>(113) | 12<br>(5)    |         | 13<br>(21)          |                                     | 13<br>(73)    | 15.20<br>(26)      |                                     | 13.5<br>(107)   | 15.08<br>(6)       |         | 13<br>(118)         | 23.07<br>(3)     |         |
| <b>90<sup>th</sup> percentile</b> | 19<br>(59)     | 19.29<br>(44) | 18.29<br>(14) |         | 18.86<br>(56)  | 22.40<br>(2) |         | 18.97<br>(10)       |                                     | 17.30<br>(35) | 24<br>(14)         |                                     | 18.83<br>(53)   | 22.74<br>(3)       |         | 18.30<br>(56)       | 31.44<br>(2)     |         |
| <b>95<sup>th</sup> percentile</b> | 24.50<br>(29)  | 24.52<br>(22) | 23.02<br>(7)  |         | 24.21<br>(28)  | 26.60<br>(1) |         | 24.32<br>(5)        |                                     | 22.81<br>(18) | 33.78<br>(7)       |                                     | 24.39<br>(27)   | 23.70<br>(2)       |         | 24.01<br>(28)       | 40.78<br>(1)     |         |
